# Supplementary material for: Wide potential and high energy density for an asymmetric aqueous supercapacitor
Source: Royal Society of Chemistry journal article supplement (doi:10.1039/c9ta06428a), 2019-01-01
Supplement: c9ta06428a1.pdf [file c9ta06428a1.pdf]

## Supporting Information

### Wide Potential and High Energy Density for Asymmetric Aqueous-supercapacitor

Xinming Wu\*, Bin Huang, Qiguan Wang,, Yan Wang

(School of Materials Science and Chemical Engineering, Xi'an Technological University, Xi'an 710032, P. R. China)

#### *Measurements and Characterization*

Morphology of the samples was investigated under JEOLJSM-6380LV (HITACHI) scanning electron microscope (SEM) at an accelerating voltage of 5 kV. Transmission electron microscope (TEM) micrographs were obtained with a HITACHI H-800, and all samples were treated by ultrasonic dispersion of ethanol solution before testing. The crystalline structure was carried out on a XRD-7000S/L diffractometer with a scan step of 6°. To determine the surface elemental compositions of the samples, the X-ray photoelectron spectra (XPS) was performed on X-ray AXIS Ultra-DLD photoelectron spectrometer using Al K $\alpha$  X-rays as the excitation source.

#### *Electrochemical performance measurements*

Electrochemical performance evaluate were performed on an electrochemical workstation (Shanghai CH Instruments Co., CHI660E) in a three-electrode electrochemical cell using 1 M Na<sub>2</sub>SO<sub>4</sub> aqueous solution as electrolyte at room temperature. The as-prepared samples were as the working electrode, while saturated calomel electrode (SCE) and a Pt mesh were used as the counter and reference electrodes, respectively. To test the electrode material of FG, one sheet of FG cut to 1

\* Corresponding author: XM. Wu (✉), Tel: +8613720456279; fax: +86 29 88173324  
. E-mail address: [Aimar\\_wu@aliyun.com](mailto:Aimar_wu@aliyun.com).

mm and were placed on the surface of a cellulose acetate membrane and immersed in 1 M HCl for 12 h to exchange their internal water and electrolyte. Then, the piece of the FG sheet was pressed against carbon cloth to separate the cellulose acetate membrane (labeled as FG-CC, Fig.S1). To get the electrochemically reduced FG-CC, the electrode was tested in 1 M Na<sub>2</sub>SO<sub>4</sub> electrolyte for 100 CV cycles at 10 mV s<sup>-1</sup> in the potential window of -1.4-0 V (labeled as Na-FG-CC, total load is about 103 mg). To test the electrode material of C@Mn<sub>3</sub>O<sub>4</sub>, C@Mn<sub>3</sub>O<sub>4</sub> was mixed with PVDF, carbon black (increase electrical conductivity) in a ration of 8:1:1 with N-methyl-2-pyrrolidone. The mixture was grinded for 15 min to obtain slurry. The obtained-slurry was later coated onto carbon cloth which served as a current collector, and the dried at 80°C overnight (labeled as C@Mn<sub>3</sub>O<sub>4</sub>-CC). To test the electrochemical performance, the C@Mn<sub>3</sub>O<sub>4</sub>-CC was directly cut to 2 cm × 4 cm (total load is about 112 mg) and used as the working electrode, saturated calomel electrode (SCE) was used as the reference electrode, and 1 M Na<sub>2</sub>SO<sub>4</sub> aqueous solution as electrolyte. The asymmetric supercapacitor was characterized in a two-electrode cell configuration in 1 M Na<sub>2</sub>SO<sub>4</sub> aqueous electrolyte. These two electrodes were subsequently assembled together with a filter paper as separator sandwiched in between. For all electrochemical performance, the measurement potential was controlled in the range of 0-2.7 V for aqueous electrolyte test. The CV was tested at current densities of 2, 5, 10, 20, and 50 mV s<sup>-1</sup>, while the GCD was measured at current density of 1, 2, 5, 10, and 20 A g<sup>-1</sup>. EIS test was measured in the measured in the frequency range from 0.01 to 10<sup>6</sup> Hz.

The specific capacitance, energy density and power density were calculated based on equation (1-3).

The specific capacitance of the samples was calculated from the charge-discharge curves based on the following equation:

$$F = (I \times \Delta t) / \Delta U \quad (1)$$

where  $F$  (F g<sup>-1</sup>) is the capacitance of the samples,  $I$  (A g<sup>-1</sup>) refers to the discharge current;  $\Delta U$  (V) is the potential window,  $\Delta t$  (s) is the discharge time.

The energy density and power density of the asymmetric supercapacitor can be

calculated from the galvanostatic charge-discharge curves via the following equation:

$$E = \frac{1}{2} \times F \times (\Delta U)^2 = (I \times \Delta t \times \Delta U) / (2 \times 3.6) \quad (2)$$

$$P = 3600E / \Delta t \quad (3)$$

where  $E$  is the energy density,  $P$  is the power density.

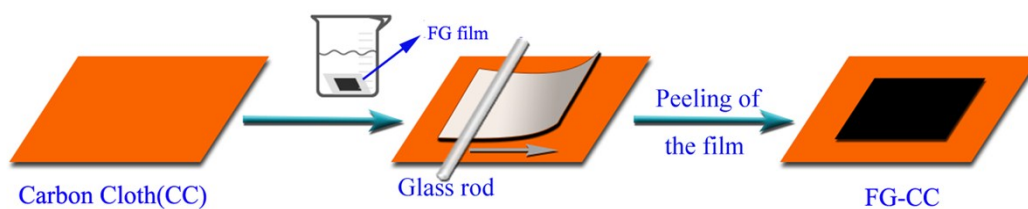

Fig. S1 Schematic illustration for the fabrication of FG-CC electrode

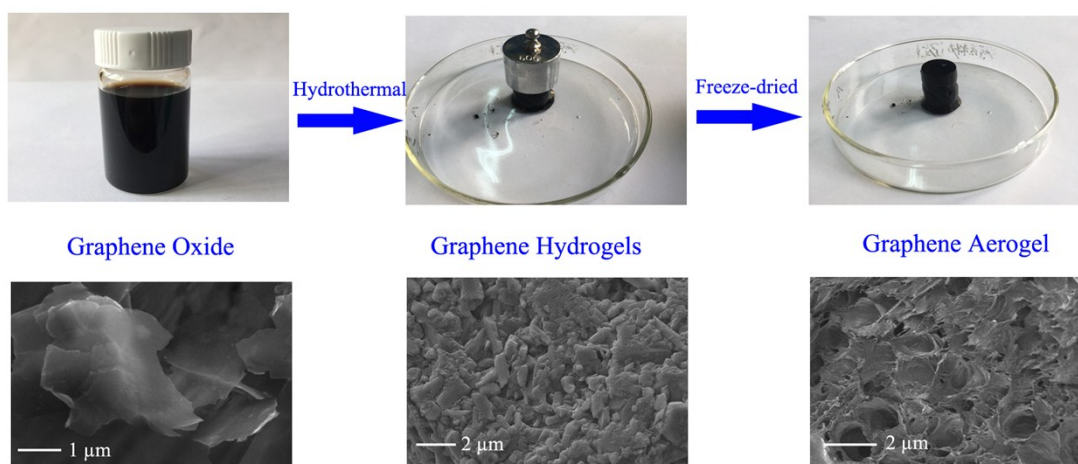

Fig. S2 Photographs of the preparation process and SEM of FG

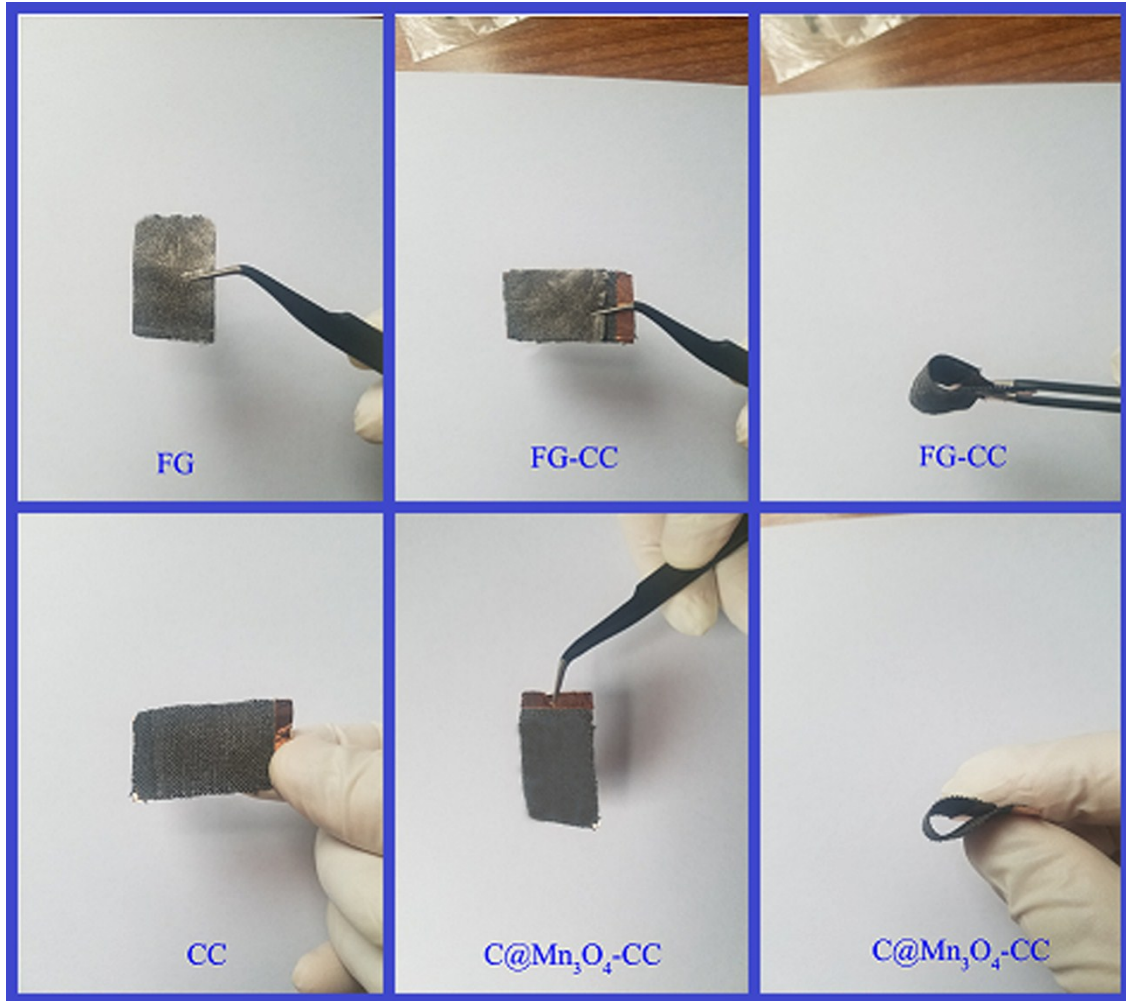

Fig. S3 Photographs of the FG-CC and C@Mn<sub>3</sub>O<sub>4</sub>-CC electrodes

$$\Delta G_{ads} = \Delta E_{ads} - T \Delta S_{ads}$$

$$\Delta E_{ads} = E_{FG+Na^+} - E_{Na^+} - E_{FG}$$

$$E_{Na^+} = E_{Na} + eU_{Na}$$

$$eU_{Na} = -2.94V(\text{vs. SCE})$$

$$E_{Na} \approx DFT(G_{Na} + T \Delta S_{Na})$$

$$\Delta S_{ads} = S_{Na^+} - S^* - S_{Na}$$

$$S_{Na^+} - S^* = \text{harmonic approximation}$$

$$S_{Na} \approx 0$$

To compare the free energy of adsorption for Na<sup>+</sup> on different defects of FG, we utilized a method involving density functional theory (DFT) calculations of

adsorption energetic and use DMol<sup>3</sup> program in Materials Studio software. The electron exchange potential was treated by PW91 functional under the generalized gradient approximation (GGA). In the calculation, X and Y directions were taken to be in the graphene plane, Z direction was perpendicular to the graphene plane, and the vacuum layer was 20 Å. In the self-consistent iteration process, the simple brillouin region integral k points were selected 2×2×1 point by Monkhorst-Pack method, and the total energy error was no more than 1.0×10<sup>-4</sup> Hartree. In the calculation, the spin was not limited, and the standard spin was selected as the initial spin. In the reciprocal k space, the orbital cut-off is selected as 5.1 Å. In all the calculations, FDT-D3 is used to deal with the van der Waals forces.

Lastly, although the effects of solvation energy and electric double layer are not considered, the relative adsorption strength of sodium for various defects in graphite is fully determined by our model. Relevant calculation results are shown in Table.S1.

Table.S1 Free energy of adsorption of Na<sup>+</sup> on different defect types in GF

| <i>Model</i>            | <i>E<sub>total</sub>(keV)</i> | <i>ΔE<sub>ads</sub>(eV)</i> | <i>D(Å)</i> | <i>TΔS*</i> | <i>ΔG<sub>ads</sub></i> | <i>Illustration</i> |
|-------------------------|-------------------------------|-----------------------------|-------------|-------------|-------------------------|---------------------|
| <b>sp<sup>2</sup>-C</b> | -36.556                       | -0.612                      | 2.28        | 0.072       | -0.684                  | Fig.S4(a)           |
| <b>sp<sup>3</sup>-C</b> | -37.599                       | -0.835                      | 2.54        | 0.124       | -0.959                  | Fig.S4(b)           |
| <b>sp<sup>3</sup>-O</b> | -37.598                       | -0.810                      | 2.06        | 0.085       | -0.895                  | Fig.S4(c)           |

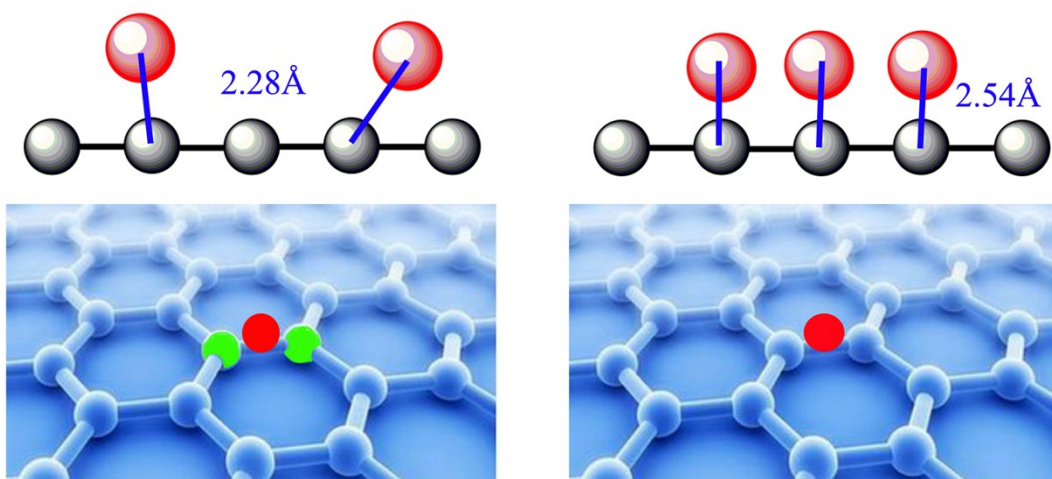

$sp^2\text{-C}$  (a)

$sp^3\text{-C}$  (b)

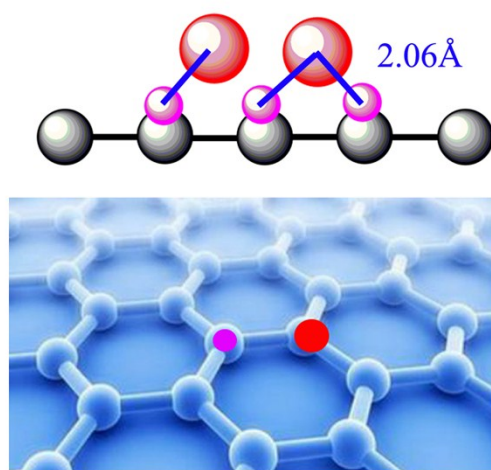

$sp^3\text{-O}$  (c)

Fig. S4 Top and side views of  $\text{Na}^+$  adsorbed on  $sp^2\text{-C}$ ,  $sp^3\text{-C}$ ,  $sp^3\text{-O}$  defects of FG

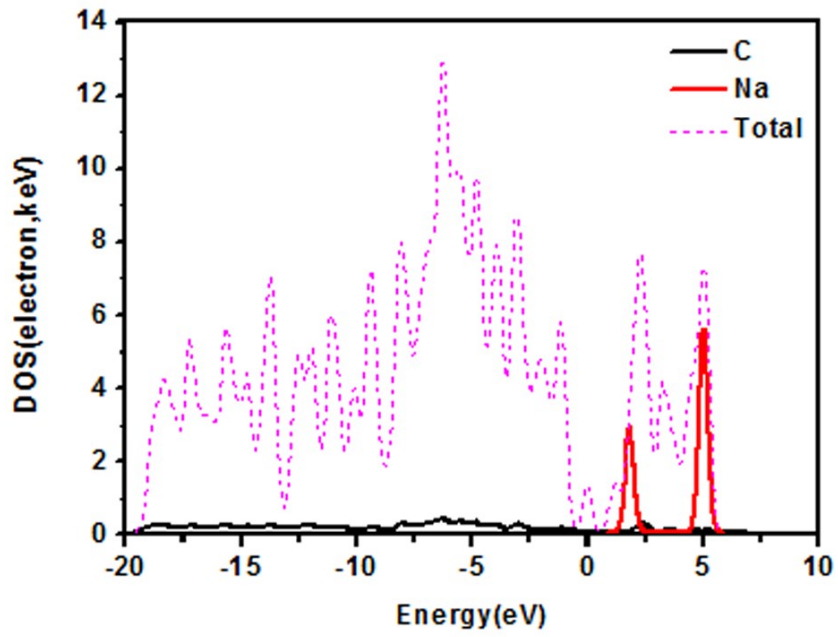

Fig.S5 The electronic densities of states (DOS) for FG after Na adsorption

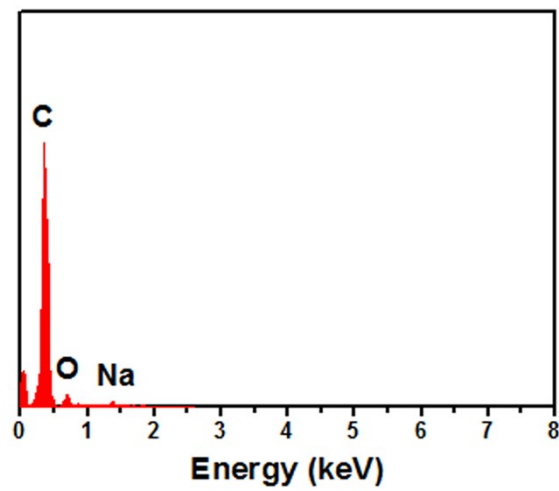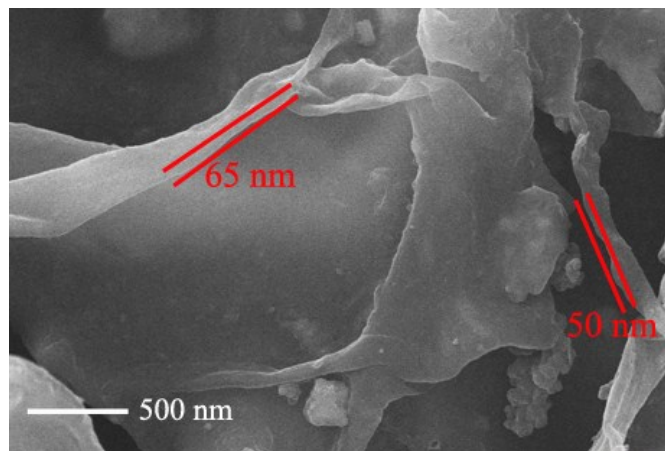

Fig.S6 EDX spectrum and high resolution SEM image of the Na-FG-CC

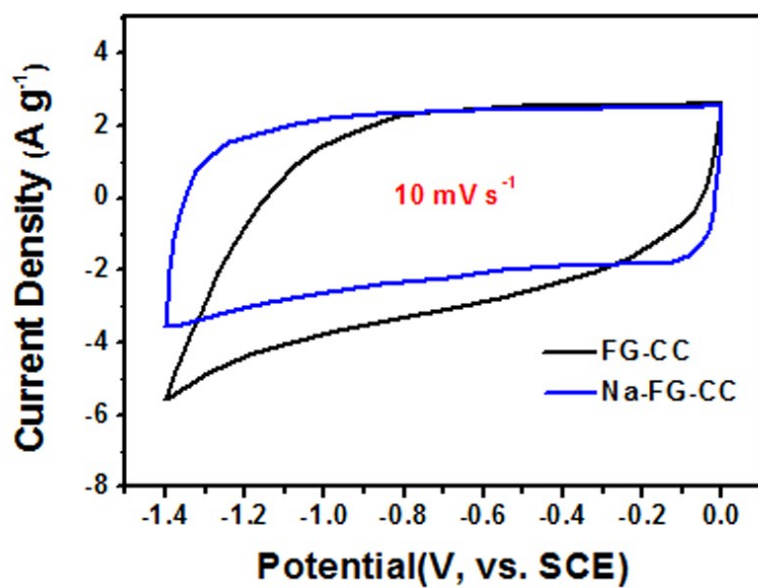

Fig.S7 CV curves of the FG-CC and Na-FG-CC (1 M Na<sub>2</sub>SO<sub>4</sub> as electrolyte)

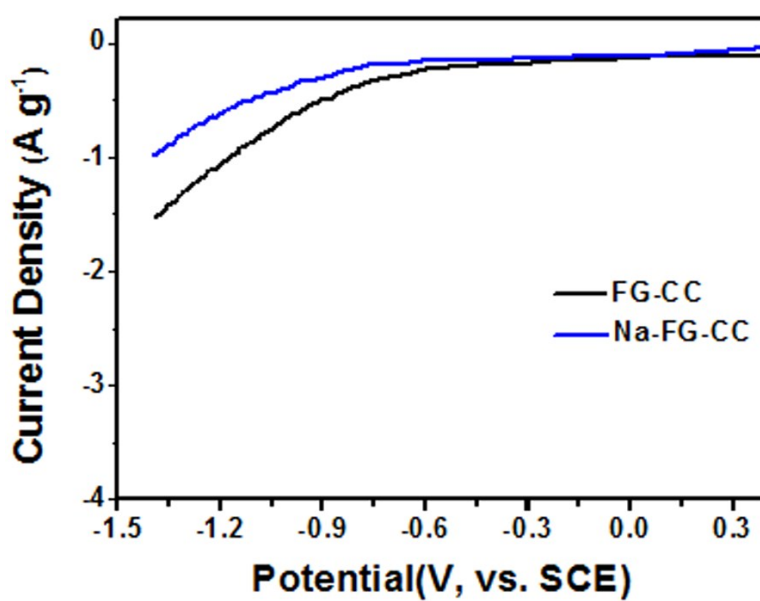

Fig.S8 Current density for the FG-CC and Na-FG-CC in 1 M Na<sub>2</sub>SO<sub>4</sub> aqueous electrolyte at 5 mV s<sup>-1</sup>, which reflects the standard potential for H<sub>2</sub> evolution.



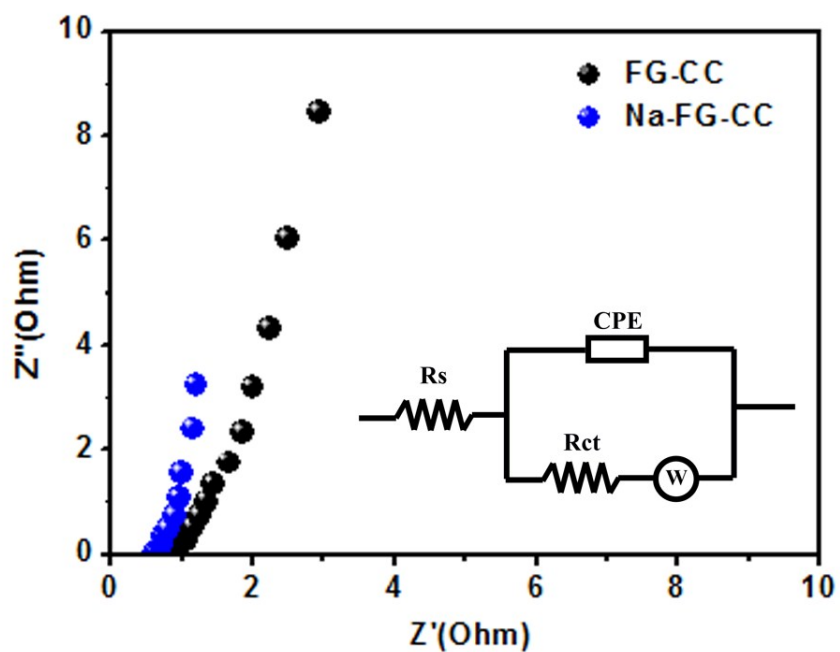

Fig.S9 Nyquist plots of the FG-CC and Na-FG-CC

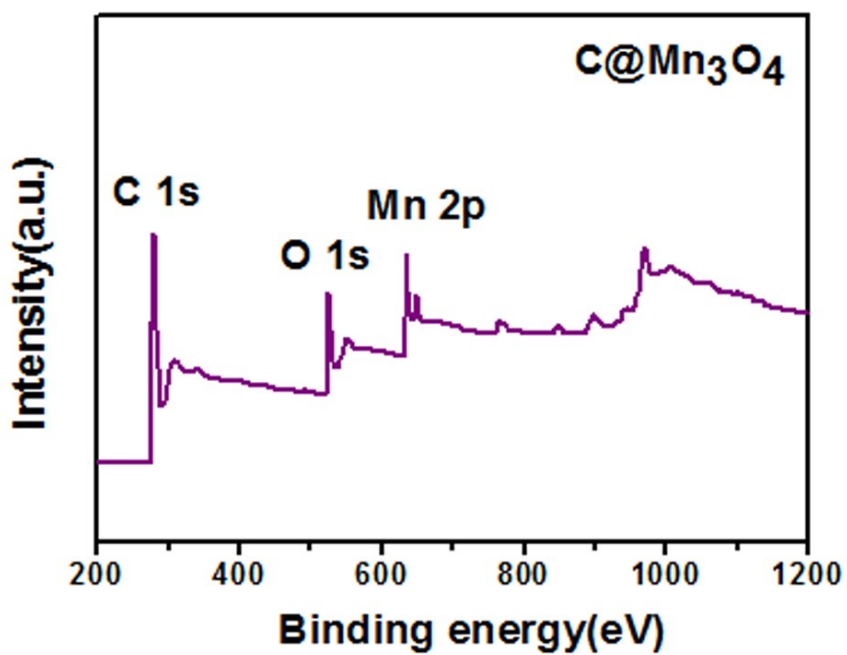

Fig.S10 The XPS survey scan spectra of the  $C@Mn_3O_4$  nanoparticles

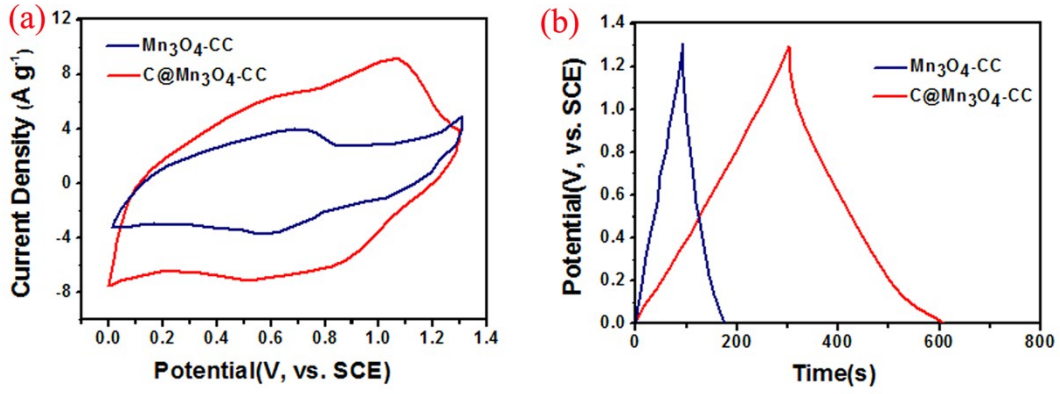

Fig.S11 Comparative CV curve of  $\text{Mn}_3\text{O}_4\text{-CC}$  and  $\text{C@Mn}_3\text{O}_4\text{-CC}$  at  $50 \text{ mV s}^{-1}$  (a), Comparative GCD curve of  $\text{Mn}_3\text{O}_4\text{-CC}$  and  $\text{C@Mn}_3\text{O}_4\text{-CC}$  at  $1.5 \text{ A g}^{-1}$  (b)

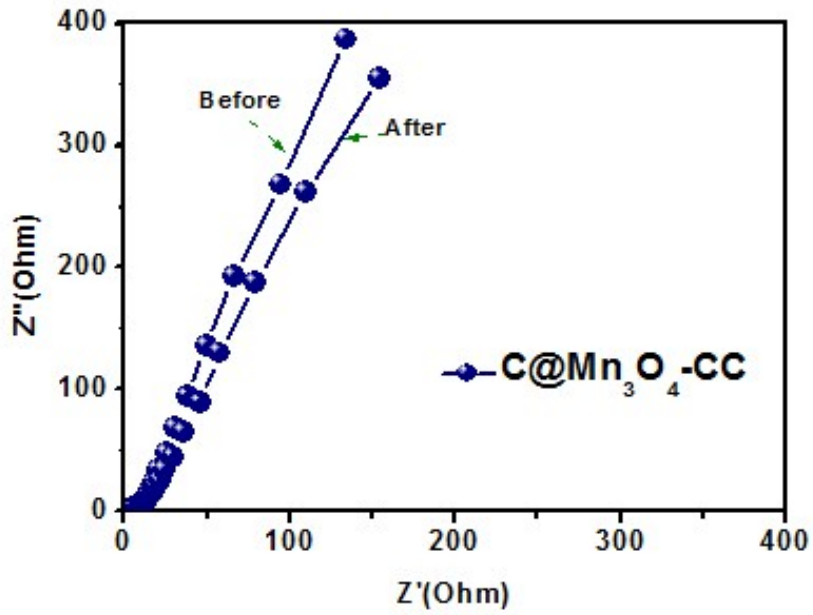

Fig.S12 Nyquist plots of the before and after cycles  $\text{C@Mn}_3\text{O}_4\text{-CC}$

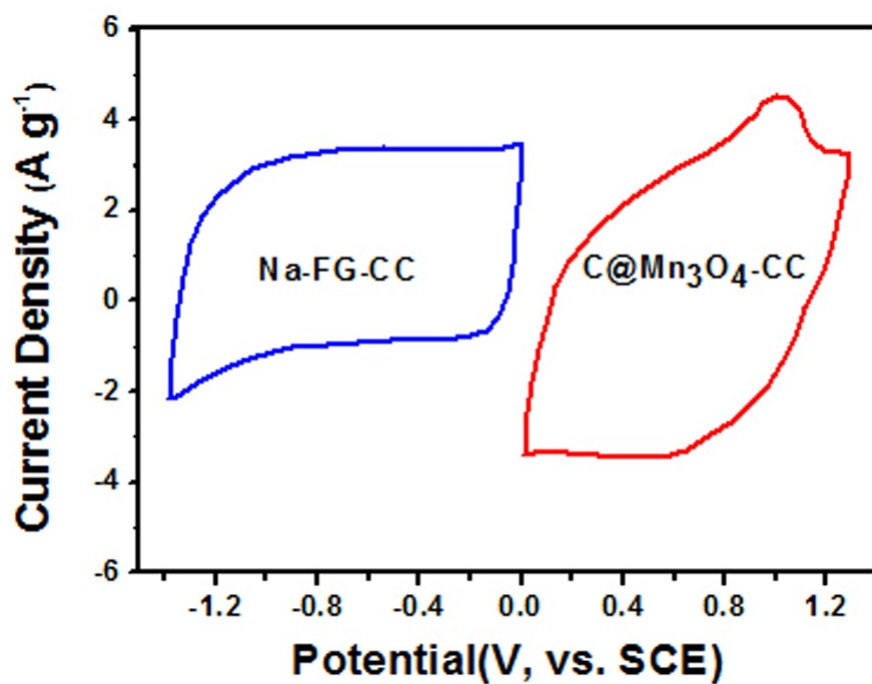

Fig.S13 CV curves of the Na-FG-CC and the C@Mn<sub>3</sub>O<sub>4</sub>-CC electrodes in separate potential windows at a scan rate of 20 mV s<sup>-1</sup>

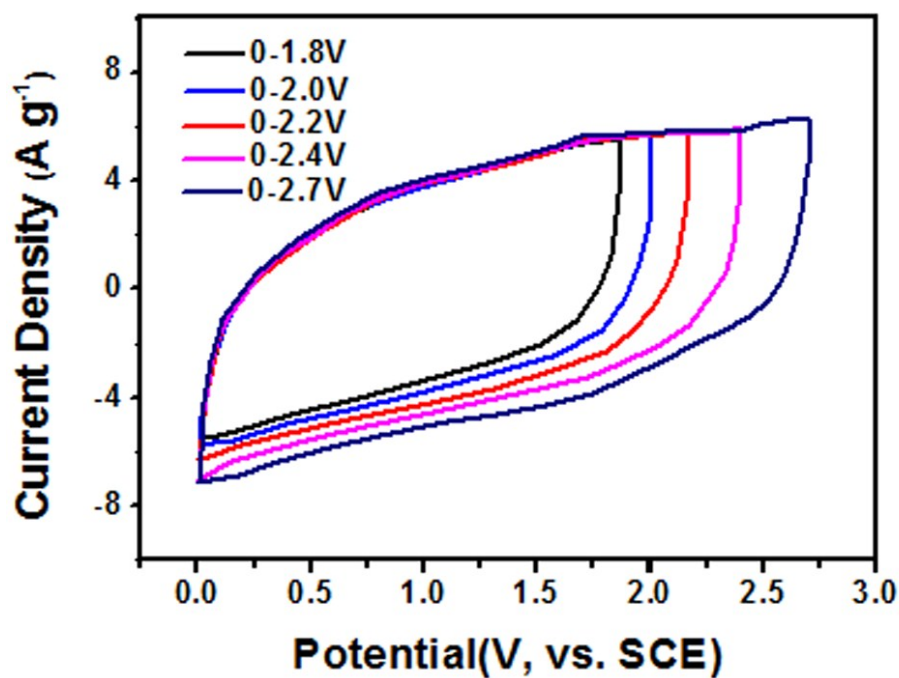

Fig.S14 CV curves of the Na-FG-CC//C@Mn<sub>3</sub>O<sub>4</sub>-CC asymmetric supercapacitor in different potential windows at a scan rate of 50 mV s<sup>-1</sup>

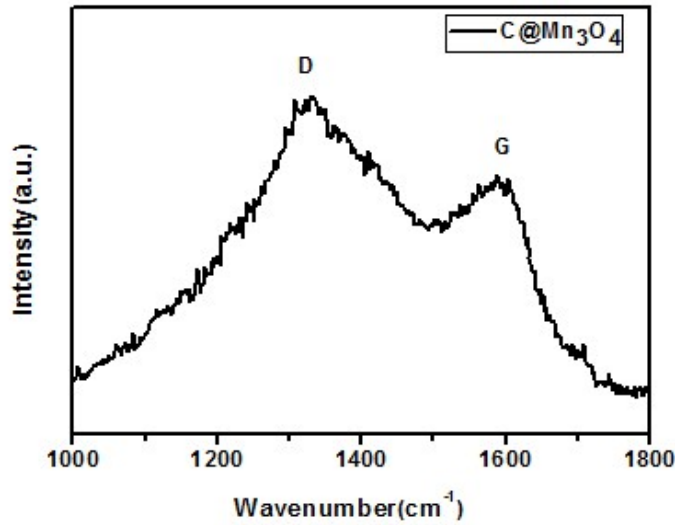

Fig.S15 Raman spectrum of the C@Mn<sub>3</sub>O<sub>4</sub>

The carbon layer was further characterized by Raman measurements. From the Fig.S15, the two major Raman bands located at 1332 and 1600 cm<sup>-1</sup>. The band at 1332 cm<sup>-1</sup> corresponds to the D peak arising from the breathing motion of sp<sup>2</sup> rings, and the band at 1600 cm<sup>-1</sup> was in good agreement with the G band. The ration between the D and G bands was found to be correlated to the nature of carbon. The measured intensity  $I_D/I_G$  ration was about 1.33, suggesting that the carbon layer existed in a disordered graphitic form.

Table.S2 Fitting values of  $F$ ,  $E$ , and  $P$  of Na-FG-CC using the equation (1-3)

| $I$ | $\Delta t$ | $\Delta U$ | $F$ | $E$  | $P$    |
|-----|------------|------------|-----|------|--------|
| 1.0 | 399        | 1.4        | 285 | 77.5 | 699    |
| 2.0 | 174        | 1.4        | 249 | 67.5 | 1396.5 |
| 5.0 | 60         | 1.4        | 215 | 58.3 | 3498   |
| 10  | 27         | 1.4        | 193 | 52.5 | 7000   |
| 20  | 11.4       | 1.4        | 164 | 44.3 | 13989  |
| 50  | 4.3        | 1.4        | 154 | 41.8 | 34995  |

Units:  $I$ : A g<sup>-1</sup>;  $\Delta t$ : s;  $F$ : F g<sup>-1</sup>;  $E$ : Wh kg<sup>-1</sup>;  $P$ : W kg<sup>-1</sup>

Table.S3 Fitting values of  $F$ ,  $E$ , and  $P$  of C@Mn<sub>3</sub>O<sub>4</sub>-CC using the equation (1-3)

| $I$ | $\Delta t$ | $\Delta U$ | $F$ | $E$  | $P$  |
|-----|------------|------------|-----|------|------|
| 0.5 | 826        | 1.3        | 318 | 74.5 | 325  |
| 1.0 | 367        | 1.3        | 283 | 66.2 | 650  |
| 2.0 | 169        | 1.3        | 260 | 61   | 1299 |
| 5.0 | 63.4       | 1.3        | 244 | 57.3 | 3250 |
| 10  | 30.4       | 1.3        | 234 | 54.9 | 6501 |

Units:  $I$ : A g<sup>-1</sup>;  $\Delta t$ : s;  $F$ : F g<sup>-1</sup>;  $E$ : Wh kg<sup>-1</sup>;  $P$ : W kg<sup>-1</sup>

Table.S4 Fitting values of  $F$ ,  $E$ , and  $P$  of asymmetric aqueous-supercapacitor using the equation (1-3)

| $I$ | $\Delta t$ | $\Delta U$ | $F$ | $E$   | $P$   |
|-----|------------|------------|-----|-------|-------|
| 1.0 | 294        | 2.7        | 109 | 110.4 | 1352  |
| 2.0 | 120        | 2.7        | 89  | 90    | 2703  |
| 5.0 | 39.4       | 2.7        | 73  | 73.9  | 6753  |
| 10  | 17.3       | 2.7        | 64  | 64.8  | 13484 |
| 20  | 7.7        | 2.7        | 57  | 57.7  | 26982 |

Units:  $I$ : A g<sup>-1</sup>;  $\Delta t$ : s;  $F$ : F g<sup>-1</sup>;  $E$ : Wh kg<sup>-1</sup>;  $P$ : W kg<sup>-1</sup>

Table.S5 Comparison study on the electrochemical performance of asymmetric aqueous-supercapacitor in this work with previously reported results

| Active materials                                          | Electrolyte                         | Potential | $F$ (F g <sup>-1</sup> ) | $E$ (Wh kg <sup>-1</sup> ) | $P$ (W kg <sup>-1</sup> ) | Capacitance retention  | Ref. |
|-----------------------------------------------------------|-------------------------------------|-----------|--------------------------|----------------------------|---------------------------|------------------------|------|
| MnO <sub>x</sub> /CF//MnO <sub>x</sub> /carbon nanofibers | 1 M Na <sub>2</sub> SO <sub>4</sub> | 0~1.8V    | 82                       | 18                         | 11000                     | 94 % after 5000 cycles | [1]  |
| MnO <sub>2</sub> /GO//porous                              | 1 M Na <sub>2</sub> SO <sub>4</sub> | 0~2V      | --                       | 46.7                       | 2000                      | 93% after              | [2]  |

|                                                                        |                                         |        |           |            |            |                                   |                |      |
|------------------------------------------------------------------------|-----------------------------------------|--------|-----------|------------|------------|-----------------------------------|----------------|------|
| carbon                                                                 |                                         |        |           |            |            |                                   | 4000<br>cycles |      |
| CF/MnO <sub>2</sub> //<br>AC                                           | 1 M Na <sub>2</sub> SO <sub>4</sub>     | 0~2v   | 57        | 36.7       | 7700       | 92 % after<br>10000<br>cycles     |                | [3]  |
| MnO <sub>2</sub> /PANI//AC                                             | PVA/<br>Na <sub>2</sub> SO <sub>4</sub> | 0~1.7V | 100.<br>2 | 40.2       | 6300       | --                                |                | [4]  |
| rGO/MnO <sub>x</sub> //AC                                              | [C <sub>2</sub> MIm]<br>F <sub>4</sub>  | 0~2.7V | 47.3      | 29.7       | 2080<br>0  | 96% after<br>8000<br>cycles       |                | [5]  |
| MnO <sub>2</sub> @CNT//MoO <sub>3</sub> @C<br>NT                       | 1 M Na <sub>2</sub> SO <sub>4</sub>     | 0~2V   | --        | 27.8       | 1000<br>0  | 96.8%<br>after 10000<br>cycles    |                | [6]  |
| Na <sub>0.25</sub> MnO <sub>2</sub> //ERPC                             | 1 M Na <sub>2</sub> SO <sub>4</sub>     | 0~2.7V | 82.9      | 61.1       | 982.5      | 93.7%<br>after<br>10000<br>cycles |                | [7]  |
| PPy/MnO <sub>2</sub> //<br>AC                                          | 1 M Na <sub>2</sub> SO <sub>4</sub>     | 0~1.8V | 57        | 25.8       | 9000       | 90.3%<br>after<br>6000<br>cycles  |                | [8]  |
| CNT/MnO <sub>2</sub> //CNT/PPy                                         | 0.5M<br>Na <sub>2</sub> SO <sub>4</sub> | 0~1.6V | --        | 22.8       | 2700       | --                                |                | [9]  |
| Graphene/MnO <sub>2</sub><br>//Graphene/MoO <sub>3</sub>               | 1 M Na <sub>2</sub> SO <sub>4</sub>     | 0~2V   | --        | 42.6       | 276        | --                                |                | [10] |
| Porous carbon<br>//MnO <sub>2</sub> /carbon                            | 1 M Na <sub>2</sub> SO <sub>4</sub>     | 0~2V   | --        | 63.5       | 8000       | 93.4%<br>after<br>5000<br>cycles  |                | [11] |
| Mn <sub>3</sub> O <sub>4</sub> //NC                                    | 6 M KOH                                 | 0~1.5V | --        | 17.27<br>6 | 207.3      | 100% after<br>5000<br>cycles      |                | [12] |
| Ni@MnO <sub>2</sub> //Ni@Fe <sub>2</sub> O <sub>3</sub>                | 1M<br>Na <sub>2</sub> SO <sub>4</sub>   | 0~1.6V | --        | 34.1       | 3197.<br>7 | --                                |                | [13] |
| 3D MnO <sub>2</sub> //AC                                               | 1 M Na <sub>2</sub> SO <sub>4</sub>     | 0~1.7V | --        | 40.2       | 6227       | 90% after<br>8000<br>cycles       |                | [14] |
| Mn <sub>3</sub> O <sub>4</sub> /carbon//<br>AC                         | 1 M Na <sub>2</sub> SO <sub>4</sub>     | 0~2V   | --        | 19         | 4500       | 95% after<br>5000<br>cycles       |                | [15] |
| Na <sub>0.5</sub> MnO <sub>2</sub> //Fe <sub>3</sub> O <sub>4</sub> @C | 1 M Na <sub>2</sub> SO <sub>4</sub>     | 0~2.6V | 88        | 81         | 2000       | --                                |                | [16] |

|                                                          |                                        |              |            |              |                   |   |                                       |                           |
|----------------------------------------------------------|----------------------------------------|--------------|------------|--------------|-------------------|---|---------------------------------------|---------------------------|
|                                                          |                                        |              |            |              |                   | 0 |                                       |                           |
| MnCO <sub>3</sub> //Carbon                               | 2M KOH                                 | 0~1.6V       | 48.4       | 14.7         | 3300              |   | 97.3%<br>after<br>10000<br>cycles     | [17]                      |
| rGO@Mn <sub>3</sub> O <sub>4</sub> //rGO@VO <sub>2</sub> | 1 M Na <sub>2</sub> SO <sub>4</sub>    | 0~2.2V       | --         | 42.7         | 1126<br>0         |   | --                                    | [18]                      |
| Graphene-MnO <sub>2</sub> //graphene                     | 1 M Na <sub>2</sub> SO <sub>4</sub>    | 0~2V         | --         | 30           | 5000              |   | 79%<br>after 1000<br>cycles           | [19]                      |
| α-MnO <sub>2</sub> //α-MnO <sub>2</sub>                  | 1 M Na <sub>2</sub> SO <sub>4</sub>    | 0~0.8V       | --         | 20.8         | 3200              |   | --                                    | [20]                      |
| <b>Na-FG-CC/C@Mn<sub>3</sub>O<sub>4</sub>-<br/>CC</b>    | <b>1M Na<sub>2</sub>SO<sub>4</sub></b> | <b>0~2.7</b> | <b>109</b> | <b>110.4</b> | <b>2698<br/>2</b> |   | <b>96% after<br/>10000<br/>cycles</b> | <b>This<br/>wor<br/>k</b> |

## Reference

- [1] H. Wang, J. Deng, Y. Chen, F. Xu, Z. Wei, Y. Wang, Hydrothermal synthesis of manganese oxide encapsulated multiporous carbon nanofibers for supercapacitors *Nano Res*, 2016, 9, 2672.
- [2] Zhao, Y.; Ran, W.; He, J.; Huang, Y.; Liu, Z.; Liu, W.; Tang, Y.; Zhang, L.; Gao, D.; Gao, F., High-Performance Asymmetric Supercapacitors Based on Multilayer MnO<sub>2</sub>/Graphene Oxide Nanoflakes and Hierarchical Porous Carbon with Enhanced Cycling Stability. *Small*, 2015, 11, 1310-1319.
- [3] S. C. Lin, Y. T. Lu, Y. A. Chien, J. A. Wang, T. H. You, Y. S. Wang, C. W. Lin, C. C. M. Ma, C. C. Hu, J. Asymmetric supercapacitors based on functional electrospun carbon nanofiber/manganese oxide electrodes with high power density and energy density. *J. Power Sources*, 2017, 362, 258.
- [4] N. Liu, Y. Su, Z. Wang, Z. Wang, J. Xia, Y. Chen, Z. Zhao, Q. Li, F. Geng, Electrostatic-Interaction-Assisted Construction of 3D Networks of Manganese Dioxide Nanosheets for Flexible High-Performance Solid-State Asymmetric Supercapacitors. *ACS Nano*, 2017, 11, 7879.
- [5] Y. Wang, W. Lai, N. Wang, Z. Jiang, X. Wang, P. Zou, Z. Lin, H. J. Fan, F. Kang, C. P. Wong, C. Yang, Reduced Graphene Oxide/Mixed-valent Manganese Oxides

- Composite Electrode for Tailorable and Surface Mountable Supercapacitors with High Capacitance and Super-Long Life. *Energy Environ. Sci*, 2017, 10, 941.
- [6] Lee, T. H.; Pham, D. T.; Sahoo, R.; Seok, J.; Luu, T. H. T.; Lee, Y. H. High Energy Density and Enhanced Stability of Asymmetric Supercapacitors with Mesoporous MnO<sub>2</sub>@CNT and Nanodot MoO<sub>3</sub>@CNT Free-Standing Films. *Energy Storage Mater*, 2018, 12, 223-231.
- [7] Ting X., Teck L.T., Li L., Wee S.V. L., Junmin X. Harmonizing Energy and Power Density toward 2.7 V Asymmetric Aqueous Supercapacitor. *Adv. Energy Mater*. 2018, 8, 1702630.
- [8] W. He, C. Wang, F. Zhuge, X. Deng, X. Xu, T. Zhai, Flexible and high energy density asymmetrical supercapacitors based on core/shell conducting polymer nanowires/manganese dioxide nanoflakes. *Nano Energy*, 2017, 35, 242.
- [9] Liu, J., Zhang, L., Wu, H.B., Lin, J., Shen, Z., Lou, X.W. High-Performance Flexible Asymmetric Supercapacitors Based on A New Graphene Foam/Carbon Nanotube Hybrid Film. *Energy Environ. Sci.*, 2014, 7, 3709-3719.
- [10] Chang, J.; Jin, M.; Yao, F.; Kim, T. H.; Le, V. T.; Yue, H.; Gunes, F.; Li, B.; Ghosh, A.; Xie, S.; Lee, Y. H. Asymmetric Supercapacitors Based on Graphene/MnO<sub>2</sub> Nanospheres and Graphene/MoO<sub>3</sub> Nanosheets with High Energy Density. *Adv. Funct. Mater*, 2013, 23, 5074- 5083.
- [11] X. Wu, L. Jiang, C. Long, Z. Fan, From flour to honeycomb-like carbon foam: Carbon makes room for high energy density supercapacitors. *Nano Energy*, 2015, 13, 527.
- [12] Wang, G.; Ma, Z.; Fan, Y.; Shao, G.; Kong, L.; Gao, W. Preparation of Size-Selective Mn<sub>3</sub>O<sub>4</sub> Hexagonal Nanoplates with Superior Electrochemical Properties for Pseudocapacitors. *Phy. Chem. Chem. Phys*, 2015, 17, 23017-23025.
- [13] Li, Y.; Xu, J.;Feng,T.; Yao,Q.; Xie, J.; Xia, H. Fe<sub>2</sub>O<sub>3</sub> Nanoneedles on Ultrafine Nickel Nanotube Arrays as Efficient Anode for High-Performance Asymmetric Supercapacitors. *Adv. Func. Mater*, 2017, 27, 1606728.
- [14] Liu, N.; Su, Y.; Wang, Z.; Wang, Z.; Xia, J.; Chen, Y.; Zhao, Z.; Li, Q.; Geng,F. Electrostatic-Interaction-Assisted Construction of 3D Networks of Manganese



Dioxide Nanosheets for Flexible High-Performance Solid-State Asymmetric Supercapacitors. *ACS Nano*, 2017, 11, 7879-7888.

- [15] K. Makgopa, K. Raju, P. M. Ejikeme, K. I. Ozoemena, High-performance Mn<sub>3</sub>O<sub>4</sub>/onion-like carbon (OLC) nanohybrid pseudocapacitor: Unravelling the intrinsic properties of OLC against other carbon supports. *Carbon*, 2017, 117, 20.
- [16] Nawishta J., Ahmad H., Qiuying X., Shuo S., Junwu Z., Hui X. High-Performance 2.6 V Aqueous Asymmetric Supercapacitors based on In Situ Formed Na<sub>0.5</sub>MnO<sub>2</sub> Nanosheet Assembled Nanowall Arrays. *Adv. Mater.*, 2017, 29, 1700804.
- [17] Y. Tang, S. Chen, T. Chen, W. Guo, Y. Li, S. Mu, S. Yu, Y. Zhao, F. Wen, F. Gao, Synthesis of peanut-like hierarchical manganese carbonate microcrystals via magnetically driven self-assembly for high performance asymmetric supercapacitors. *J. Mater. Chem. A*, 2017, 5, 3923.
- [18] R. Sahoo, D.T. Pham, T.H. Lee, T.H.T. Luu, J. Seok, Y.H. Lee, Redox-Driven Route for Widening Voltage Window in Asymmetric Supercapacitor. *ACS Nano*, 2018, 12, 8494.
- [19] Wu, Z.S., Ren, W., Wang, D.W., Li, F., Liu, B., Cheng, H.M. High-Energy MnO<sub>2</sub> Nanowire/Graphene and Graphene Asymmetric Electrochemical Capacitors. *ACS Nano*, 2010, 4, 5835.
- [20] B. Z. Yu, X. D. Zhao, J. Luo, H. G. Zhang, Y. W. Zhu, G. Y. Jing, P. Ma, Z. Y. Ren, H. M. Fan, Hierarchical  $\alpha$ -MnO<sub>2</sub> Tube-on-Tube Arrays with Superior, Structure-Dependent Pseudocapacitor Performance Synthesized via a Selective Dissolution and Coherent Growth Mechanism. *Adv. Mater. Interfaces*, 2016, 3, 1500761.
